# Supplementary material for: High-performance supercapacitor electrode based on naphthoquinone-appended dopamine neurotransmitter as an efficient energy storage material
Source: Royal Society of Chemistry journal article supplement (doi:10.1039/d0nj05990k), 2021-01-01
Supplement: d0nj05990k1.pdf [file d0nj05990k1.pdf]

## Supporting Information

### High-Performance Supercapacitor Electrode Based on Naphthoquinone-Appended Dopamine Neurotransmitter as an Efficient Energy Storage Material

Madan R. Biradar,<sup>a,b,†</sup> Akshay V. Salkar,<sup>c,†</sup> Pranay P. Morajkar,<sup>\*,c</sup>, Sheshanath V. Bhosale,<sup>\*,c</sup>

Sidhanath V. Bhosale<sup>\*a,b</sup>

<sup>a</sup>Polymers and Functional Materials Division, CSIR-Indian Institute of Chemical technology, Hyderabad-500 007, Telangana, India;

<sup>b</sup> Academy of Scientific and Innovative Research (AcSIR), Ghaziabad- 201002, Uttar Pradesh, India;

<sup>c</sup>School of Chemical Sciences, Goa University, Taleigao Plateau- 403206, Goa, India.

† = equal contribution from the first two authors

\*Corresponding Authors: [svbhosale@unigoa.ac.in](mailto:svbhosale@unigoa.ac.in) ; [pranay@unigoa.ac.in](mailto:pranay@unigoa.ac.in) ; [bhosale@iict.res.in](mailto:bhosale@iict.res.in)

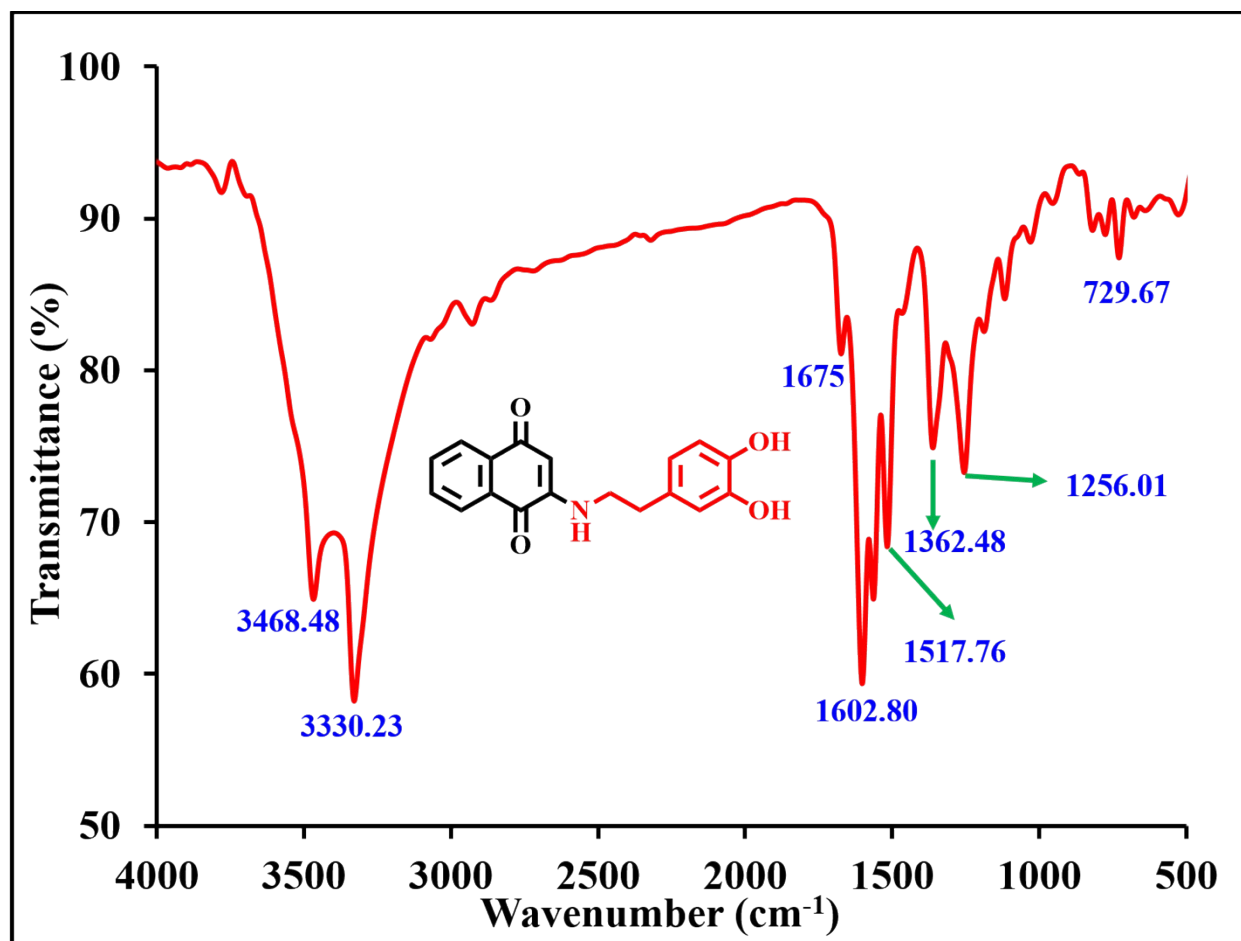

Fig. S1. FT-IR spectra of NQ-DP.

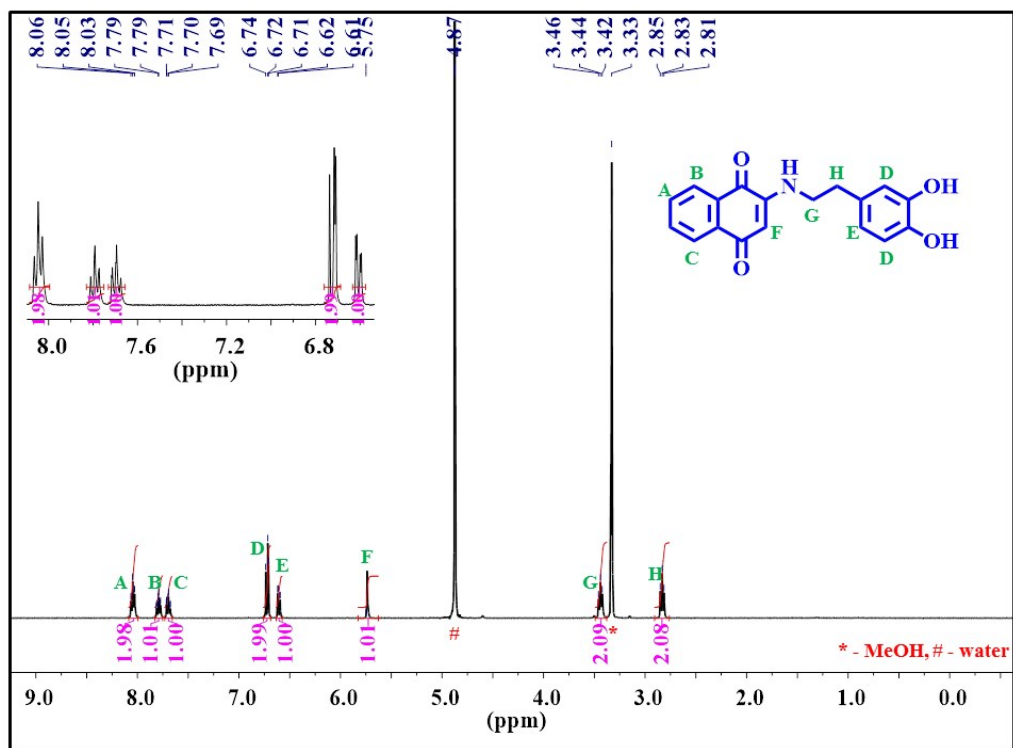

Fig. S2. <sup>1</sup>H NMR spectra of NQ-DP.

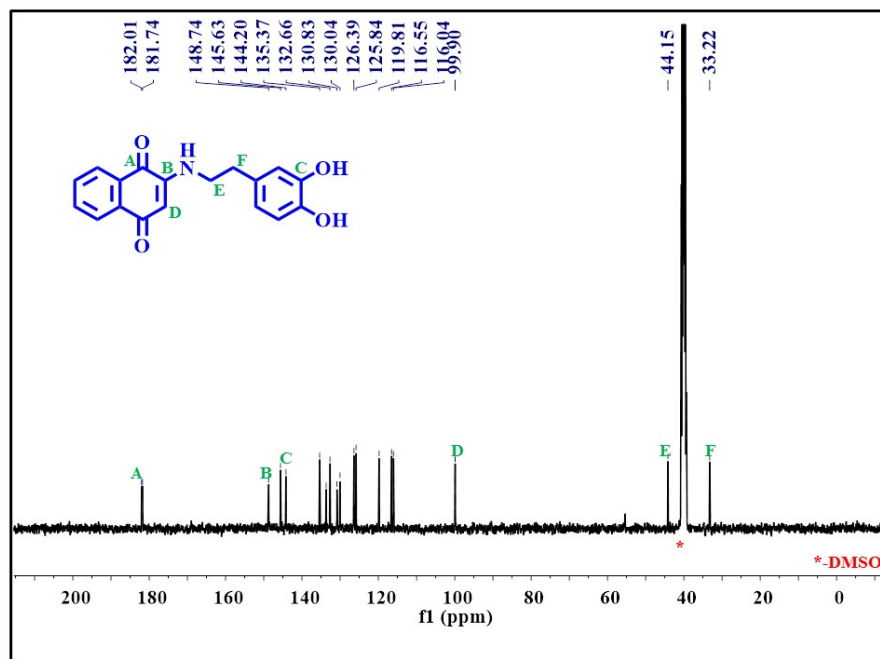

Fig. S3. <sup>13</sup>C NMR spectra of NQ-DP.

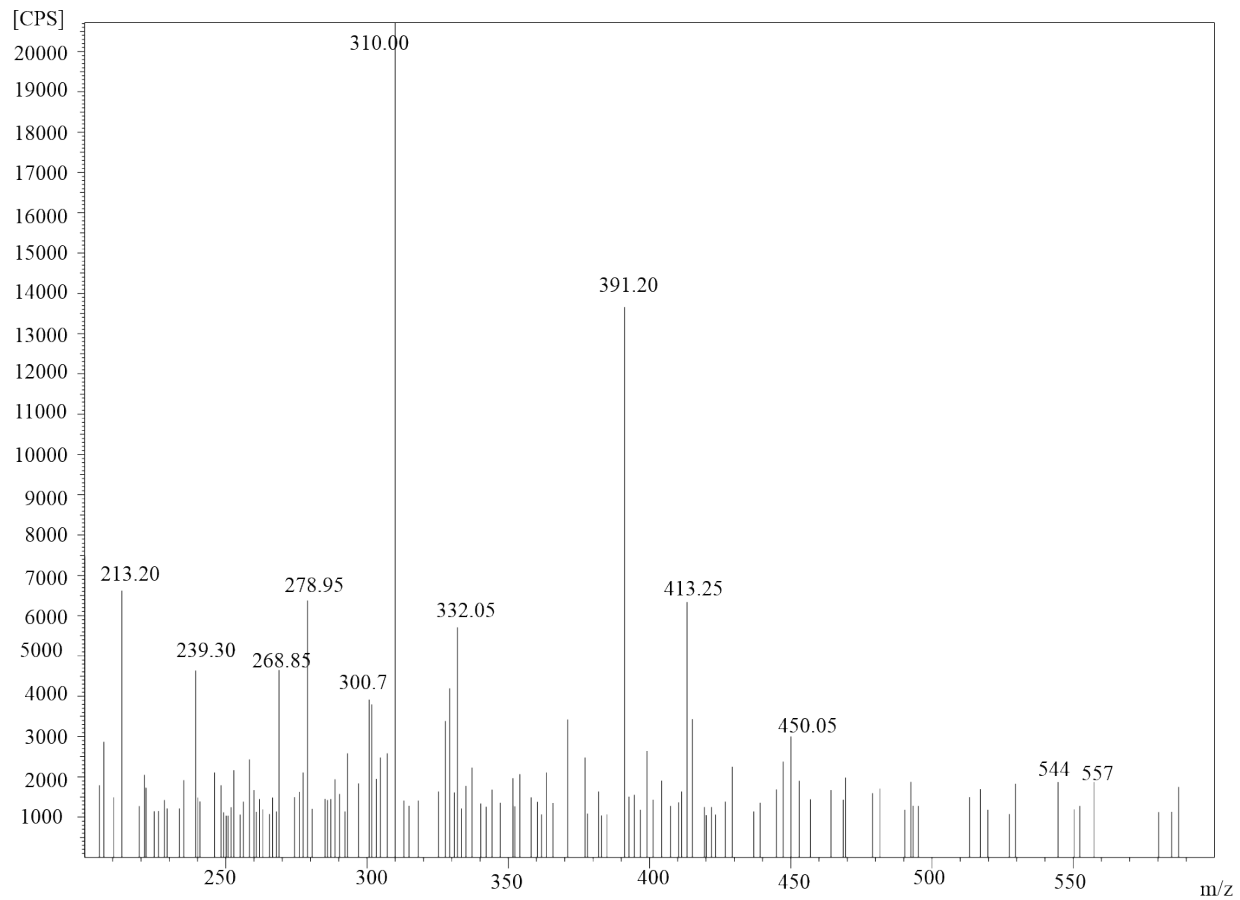

**Fig. S4.** LRMS spectrum of NQ-DP

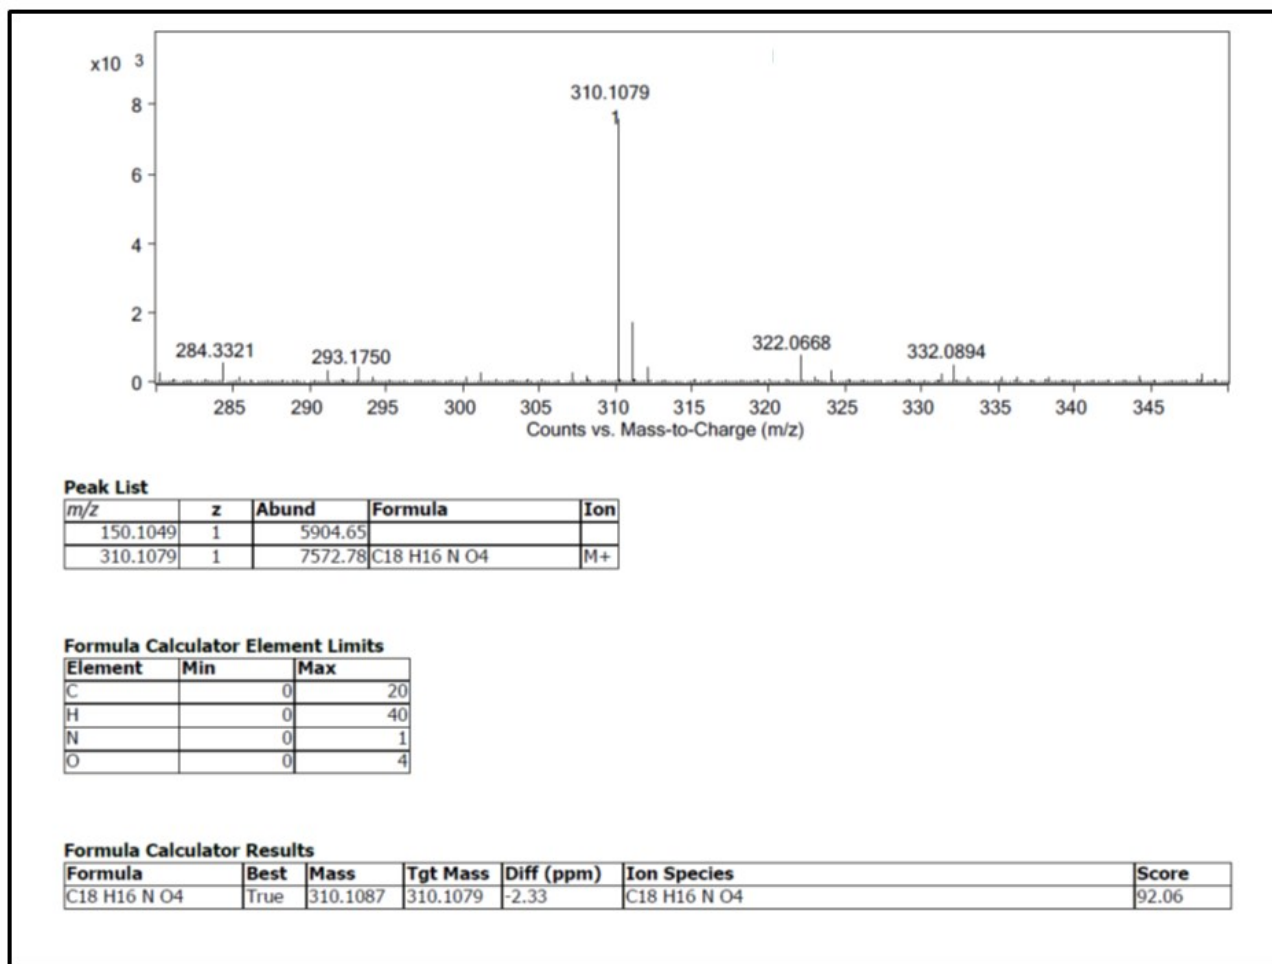

Fig. S5. HRMS spectrum of NQ-DP.

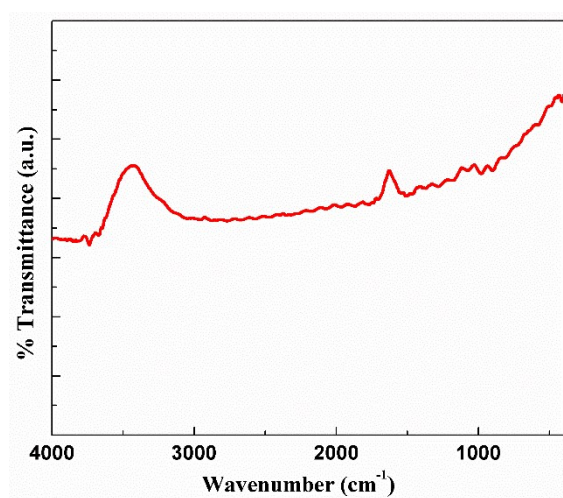

Fig. S6. IR spectrum of CP.

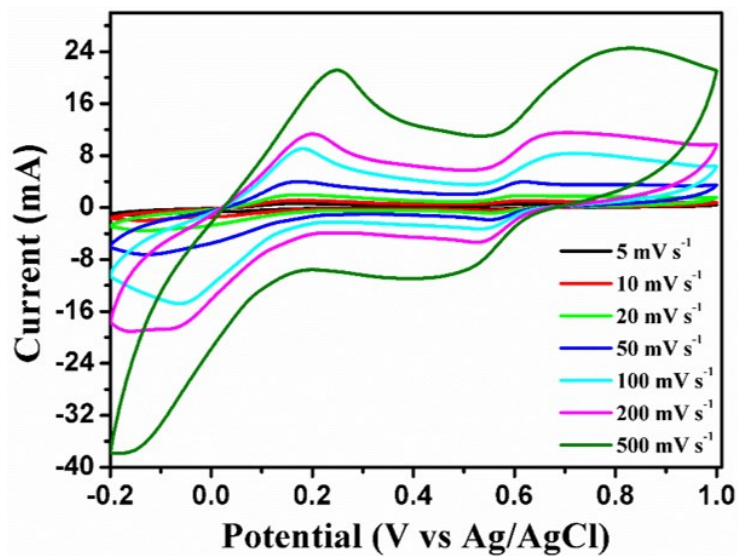

**Fig. S7.** Overlay of scan rate dependent cyclic voltammograms of NQ-DP/CP obtained in a three electrode system.

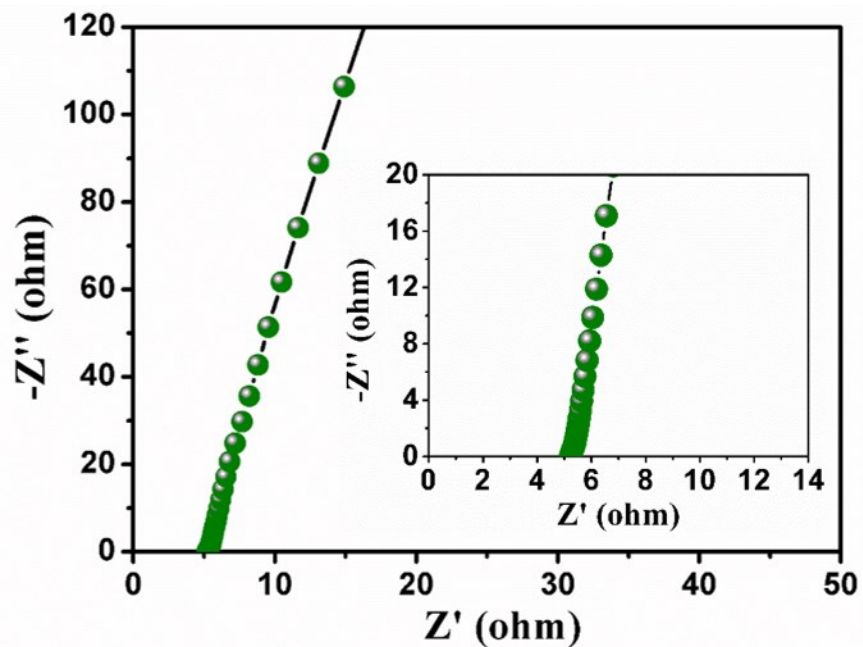

**Fig. S8.** Nyquist plot of CP electrode at open circuit potential obtained in a three electrode system.

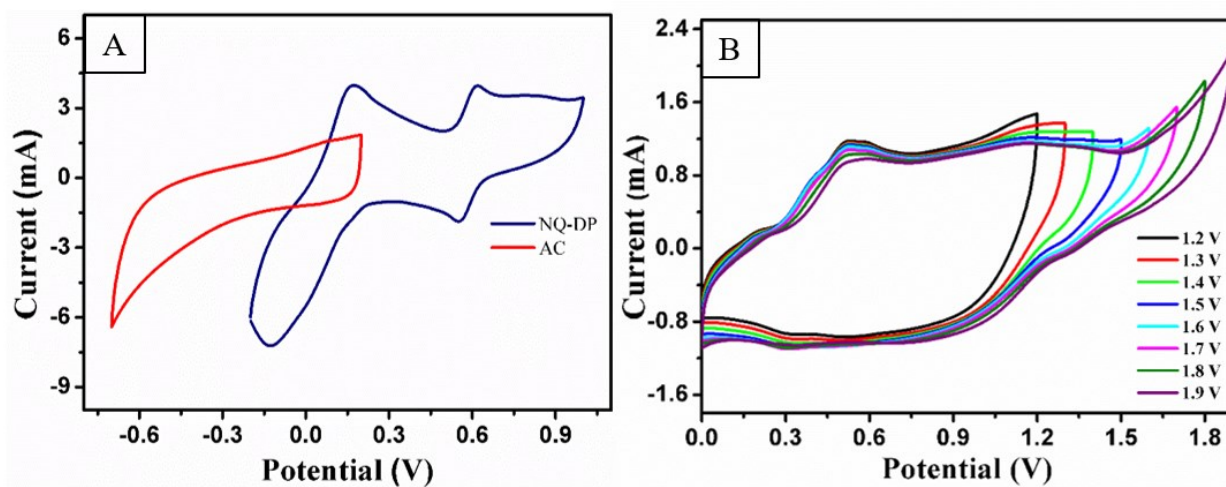

**Fig. S9.** Cyclic voltammogram overlay of (A) NQ-DP/CP and AC/CP recorded at a scan rate of 50 mV s<sup>-1</sup> and (B) asymmetric supercapacitor device at different voltage windows from 1.2 to 1.9 V recorded at a fixed scan of 50 mV s<sup>-1</sup>.

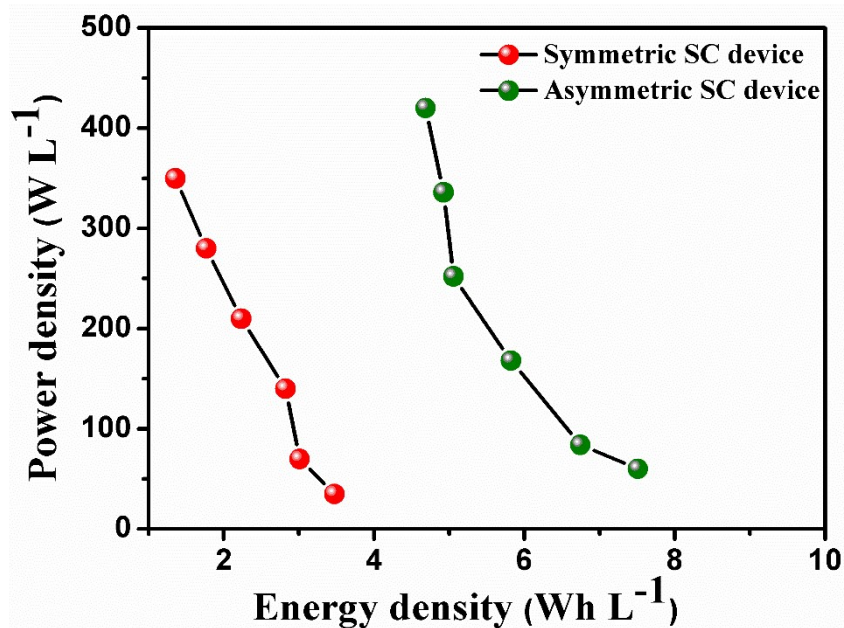

**Fig. S10.** Overlay of the volumetric power density and volumetric energy density plots for the symmetric and asymmetric supercapacitor devices.
